# Supplementary material for: Analysing EHR navigation patterns and digital workflows among physicians during ICU pre-rounds
Source: PubMed Central journal article supplement — Health Inf Manag. 2020 Jun 1;50(3):107–17. doi: 10.1177/1833358320920589 (PMC8435833; doi:10.1177/1833358320920589), 2020-06-01
Supplement: APPENDIX.pdf [file APPENDIX.pdf]

# APPENDIX

## I. Observation checklist used by research assistants

Date:

Observers:

Patient Number:

StartTime:

EndTime:

**Key:**

- P=Page(Received)
- I=Interruption(E.g. Question from staff member or colleague, code or RRT)
- C=Cell Phone(Checking e.g. received call, text or checking time)
- S=Social Interactions
- T=Toggle

|   | Use Filter?                                                                                           | Number of Distractions                                                                              | Scrolling Burden                                                                                    | Toggling                                                                                            | External                                                                                            |
|---|-------------------------------------------------------------------------------------------------------|-----------------------------------------------------------------------------------------------------|-----------------------------------------------------------------------------------------------------|-----------------------------------------------------------------------------------------------------|-----------------------------------------------------------------------------------------------------|
|   | <input type="checkbox"/> YES/NO<br><input type="checkbox"/> YES/NO<br><input type="checkbox"/> YES/NO | <input type="checkbox"/> <input type="checkbox"/> <input type="checkbox"/> <input type="checkbox"/> | <input type="checkbox"/> <input type="checkbox"/> <input type="checkbox"/> <input type="checkbox"/> | <input type="checkbox"/> <input type="checkbox"/> <input type="checkbox"/> <input type="checkbox"/> | <input type="checkbox"/> <input type="checkbox"/> <input type="checkbox"/> <input type="checkbox"/> |
| ↓ | <input type="checkbox"/> YES/NO<br><input type="checkbox"/> YES/NO<br><input type="checkbox"/> YES/NO | <input type="checkbox"/> <input type="checkbox"/> <input type="checkbox"/> <input type="checkbox"/> | <input type="checkbox"/> <input type="checkbox"/> <input type="checkbox"/> <input type="checkbox"/> | <input type="checkbox"/> <input type="checkbox"/> <input type="checkbox"/> <input type="checkbox"/> | <input type="checkbox"/> <input type="checkbox"/> <input type="checkbox"/> <input type="checkbox"/> |
| ↓ | <input type="checkbox"/> YES/NO<br><input type="checkbox"/> YES/NO<br><input type="checkbox"/> YES/NO | <input type="checkbox"/> <input type="checkbox"/> <input type="checkbox"/> <input type="checkbox"/> | <input type="checkbox"/> <input type="checkbox"/> <input type="checkbox"/> <input type="checkbox"/> | <input type="checkbox"/> <input type="checkbox"/> <input type="checkbox"/> <input type="checkbox"/> | <input type="checkbox"/> <input type="checkbox"/> <input type="checkbox"/> <input type="checkbox"/> |
| ↓ | <input type="checkbox"/> YES/NO<br><input type="checkbox"/> YES/NO<br><input type="checkbox"/> YES/NO | <input type="checkbox"/> <input type="checkbox"/> <input type="checkbox"/> <input type="checkbox"/> | <input type="checkbox"/> <input type="checkbox"/> <input type="checkbox"/> <input type="checkbox"/> | <input type="checkbox"/> <input type="checkbox"/> <input type="checkbox"/> <input type="checkbox"/> | <input type="checkbox"/> <input type="checkbox"/> <input type="checkbox"/> <input type="checkbox"/> |
| ↓ | <input type="checkbox"/> YES/NO<br><input type="checkbox"/> YES/NO<br><input type="checkbox"/> YES/NO | <input type="checkbox"/> <input type="checkbox"/> <input type="checkbox"/> <input type="checkbox"/> | <input type="checkbox"/> <input type="checkbox"/> <input type="checkbox"/> <input type="checkbox"/> | <input type="checkbox"/> <input type="checkbox"/> <input type="checkbox"/> <input type="checkbox"/> | <input type="checkbox"/> <input type="checkbox"/> <input type="checkbox"/> <input type="checkbox"/> |
| ↓ | <input type="checkbox"/> YES/NO<br><input type="checkbox"/> YES/NO<br><input type="checkbox"/> YES/NO | <input type="checkbox"/> <input type="checkbox"/> <input type="checkbox"/> <input type="checkbox"/> | <input type="checkbox"/> <input type="checkbox"/> <input type="checkbox"/> <input type="checkbox"/> | <input type="checkbox"/> <input type="checkbox"/> <input type="checkbox"/> <input type="checkbox"/> | <input type="checkbox"/> <input type="checkbox"/> <input type="checkbox"/> <input type="checkbox"/> |
| ↓ | <input type="checkbox"/> YES/NO<br><input type="checkbox"/> YES/NO<br><input type="checkbox"/> YES/NO | <input type="checkbox"/> <input type="checkbox"/> <input type="checkbox"/> <input type="checkbox"/> | <input type="checkbox"/> <input type="checkbox"/> <input type="checkbox"/> <input type="checkbox"/> | <input type="checkbox"/> <input type="checkbox"/> <input type="checkbox"/> <input type="checkbox"/> | <input type="checkbox"/> <input type="checkbox"/> <input type="checkbox"/> <input type="checkbox"/> |
| ↓ | <input type="checkbox"/> YES/NO<br><input type="checkbox"/> YES/NO<br><input type="checkbox"/> YES/NO | <input type="checkbox"/> <input type="checkbox"/> <input type="checkbox"/> <input type="checkbox"/> | <input type="checkbox"/> <input type="checkbox"/> <input type="checkbox"/> <input type="checkbox"/> | <input type="checkbox"/> <input type="checkbox"/> <input type="checkbox"/> <input type="checkbox"/> | <input type="checkbox"/> <input type="checkbox"/> <input type="checkbox"/> <input type="checkbox"/> |
| ↓ | <input type="checkbox"/> YES/NO<br><input type="checkbox"/> YES/NO<br><input type="checkbox"/> YES/NO | <input type="checkbox"/> <input type="checkbox"/> <input type="checkbox"/> <input type="checkbox"/> | <input type="checkbox"/> <input type="checkbox"/> <input type="checkbox"/> <input type="checkbox"/> | <input type="checkbox"/> <input type="checkbox"/> <input type="checkbox"/> <input type="checkbox"/> | <input type="checkbox"/> <input type="checkbox"/> <input type="checkbox"/> <input type="checkbox"/> |

1. **Scrolling burden** indicates the degree to which the user was deemed by the observer to be scrolling up or down on a given EHR screen. Observers made this indication with upward or downward arrows to indicate the direction of the scroll and rated the scrolling burden on a scale from 1 to 3, with 1 arrow representing mild scrolling and 3 arrows indicating severe scrolling burden.
2. **Toggling** indicates whether the user was deemed to be flipping back and forth between the EHR screen and another window, such as a pop-up window containing a chest x-ray image or a pop-up window involving the web-based institutional paging system. This was assessed on a binary (yes/no) scale and indicated with a "+".
3. **External** indicates whether the user was deemed to be using any external resources, such as web-based calculators or clinical resource guides.

## II. Example annotated observation checklist from live observation.

Date: 1/30  
 Observers: ST (CE)  
 Patient Number: 4  
 Start Time: 25:00  
 End Time: 30:30

**Key:**

- P = Page (Received)
- I = Interruption (E.g. question from staff member or colleague, code or RRT)
- C = Cell Phone (Checking e.g. received call, text or checking time)
- S = Social Interactions
- T = Toggle

|                | Use of Filter?             | Number of Distractions | Scrolling Burden | Scrolling | Scrolling | Scrolling | External |
|----------------|----------------------------|------------------------|------------------|-----------|-----------|-----------|----------|
| FS             | YES/NO<br>YES/NO<br>YES/NO |                        |                  |           |           |           |          |
| Micro          | YES/NO<br>YES/NO<br>YES/NO | top button             |                  |           |           |           |          |
| Results Review | YES/NO<br>YES/NO<br>YES/NO | stop - take notes      |                  |           |           |           |          |
| Chart Review   | YES/NO<br>YES/NO<br>YES/NO |                        |                  |           |           |           |          |
| Summary        | YES/NO<br>YES/NO<br>YES/NO |                        |                  |           |           |           |          |
| Chart Review   | YES/NO<br>YES/NO<br>YES/NO |                        |                  |           |           |           |          |
| Orders         | YES/NO<br>YES/NO<br>YES/NO |                        |                  |           |           |           |          |
|                | YES/NO<br>YES/NO<br>YES/NO |                        |                  |           |           |           |          |

1. **Scrolling burden** indicates the degree to which the user was deemed by the observer to be scrolling up or down on a given EHR screen. Observers made this indication with upward or downward arrows to indicate the direction of the scroll and rated the scrolling burden on a scale from 1 to 3, with 1 arrow representing mild scrolling and 3 arrows indicating severe scrolling burden.

2. **Scrolling** indicates whether the user was deemed to be flipping back and forth between the EHR screen and another window, such as a pop-up window containing a chest x-ray image or a pop-up window involving the web-based institutional paging system. This was assessed on a binary (yes/no) scale and indicated with a "+".

3. **External** indicates whether the user was deemed to be using any external resources, such as web-based calculators or clinical resource guides.

### III. Interrater Reliability

| Participant | Total EHR Screens | # of Screens w/ agreement by 2 observers | IRR* (% Agreement) |
|-------------|-------------------|------------------------------------------|--------------------|
| 1           | 42                | 33                                       | 78.6%              |
| 2           | 63                | 51                                       | 81.0%              |
| 3           | 71                | 61                                       | 85.9%              |
| 4           | 62                | 47                                       | 75.8%              |
| 5           | 56                | 42                                       | 75.0%              |
| 6           | 36                | 30                                       | 83.3%              |
| TOTAL       | 330               | 264                                      | 80.0%              |

\***IRR** = interrater reliability, calculated as percent agreement for the observed EHR screens. Agreement was defined as both observers recording the same EHR screen in the same sequential workflow position for a given participant. IRR was calculated once for each participant and once in aggregate. Given that this work was performed as a pilot test as part of a larger mixed-methods investigation, no acceptability threshold was set in advance. No data were deemed unacceptable for inclusion. The paired observation sessions took place over three days between December 2017 – February 2018; given this limited timeframe and the range (75.0% - 85.9%), analysis for chronological trend in IRR was deferred.

### IV. Results: Distractions Observed During Pre-Rounding Chart Review

| KEY |                    | Participant |   |   |    |    |   | TOTAL | %     |
|-----|--------------------|-------------|---|---|----|----|---|-------|-------|
|     |                    | 1           | 2 | 3 | 4  | 5  | 6 |       |       |
| I   | Interruption       | 2           | 2 | 6 | 3  | 5  | 3 | 21    | 38.2% |
| S   | Social interaction | 4           | 2 | 3 | 10 | 8  | 2 | 29    | 52.7% |
| P   | Pager              | 0           | 1 | 0 | 2  | 0  | 1 | 4     | 7.3%  |
| C   | Cell phone         | 0           | 0 | 0 | 1  | 0  | 0 | 1     | 1.8%  |
|     |                    | 6           | 5 | 9 | 16 | 13 | 6 | 55    |       |

**Interruption** = clinical question involving face-to-face dialogue with colleague; rapid response or “code blue” (i.e., a medical emergency during which the participant was called to bedside to assess the patient), etc.

**Social interaction** = making small talk with colleague or co-worker, non-clinical conversation, etc.

**Pager** = page received

**Cell phone** = phone call received, text message sent or received, checking time, using calculator, etc.
